# Supplementary material for: A Baltic Sea estuary as phosphorus source and sink
Source: Copernicus journal article supplement (doi:10.5194/bg-2017-496), 2017-11-24

**Supplement Table 2.** Linear regressions ( $y=Ax+B$ ) used to correct total phosphorus (TP), dissolved inorganic P (DIP) and salinity (Sal) data from the central stations to represent the whole inner archipelago (n=52).

|            | R <sup>2</sup> | A    | B    |
|------------|----------------|------|------|
| TP 0-4 m   | 0,93           | 0,91 | 0,88 |
| TP 4-10m   | 0,95           | 0,97 | 0,50 |
| TP 10-20m  | 0,95           | 1,02 | 0,62 |
| TP 20-57m  | 0,98           | 1,07 | 0,12 |
| TP 0-57m   | 0,97           | 1,00 | 1,41 |
| DIP 0-4m   | 0,92           | 0,85 | 0,23 |
| DIP 4-10m  | 0,93           | 0,92 | 0,14 |
| DIP 10-20m | 0,96           | 0,96 | 1,36 |
| DIP 20-57m | 0,98           | 1,02 | 0,98 |
| DIP 0-57m  | 0,96           | 0,92 | 0,77 |
| Sal 0-4m   | 0,98           | 0,84 | 0,30 |
| Sal 4-10m  | 0,98           | 0,85 | 0,46 |
| Sal 10-20m | 0,97           | 0,91 | 0,24 |
| Sal 20-57m | 0,98           | 0,92 | 0,37 |
| Sal 0-57m  | 0,99           | 0,88 | 0,35 |

**Supplement 3.** Ten-year (1976-1985, 1986-1995, 1996-2005, 2006-2015 [2011 excluded]) model interpolated monthly means and changes of standing P stock in water (upper panels), P input and export with boundary model (second row panels), net P losses in upper water layers 0-20m and net P release in deep water (>20m) with mean model (third row panels), and deep-water oxygen consumption, minimum oxygen concentration and temperature (lower panels). Error bars show standard deviation among years.

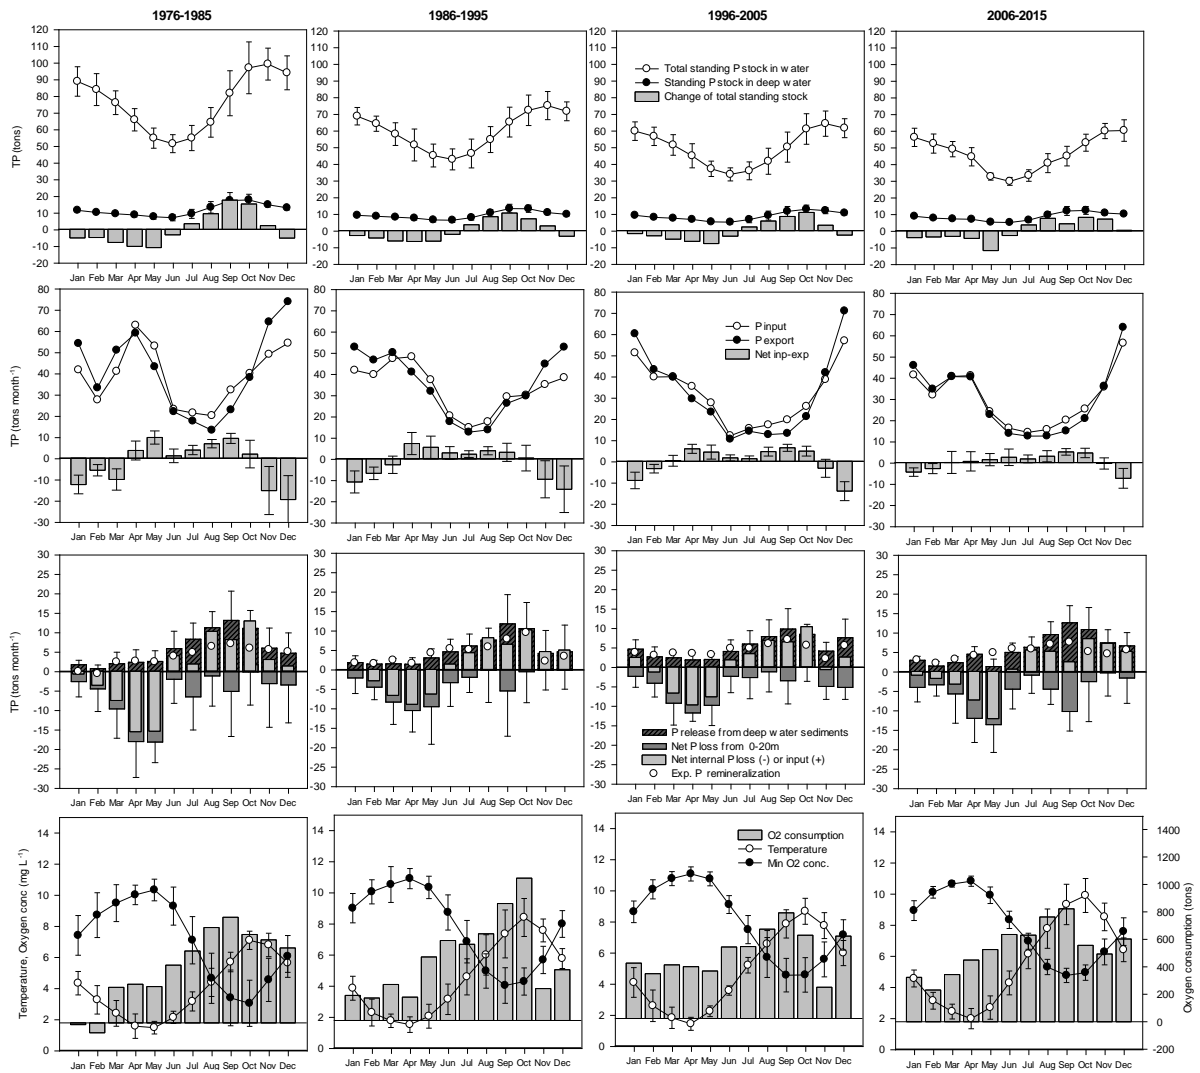

Supplement: Supplementary file 1 [file bg-2017-496-supplement.pdf]
